# Supplementary material for: Patterned growth of AgBiS2 nanostructures on arbitrary substrates for broadband and eco-friendly optoelectronic sensing
Source: Royal Society of Chemistry journal article supplement (doi:10.1039/d4nr00499j), 2024-01-01
Supplement: d4nr00499j1.pdf [file d4nr00499j1.pdf]

# Supporting Information

## **Patterned Growth of AgBiS<sub>2</sub> Nanostructures on Arbitrary Substrates for Broadband and Eco-Friendly Optoelectronic Sensing**

Yu Miao,<sup>a</sup> Zhuoran Wang,<sup>\*a</sup> Zhongming Wei<sup>b</sup> and Guozhen Shen<sup>\*a</sup>

<sup>a.</sup> *School of Integrated Circuits and Electronics, Beijing Institute of Technology, Beijing 100081, China.*

<sup>b.</sup> *State Key Laboratory of Superlattices and Microstructures, Institute of Semiconductors, Chinese Academy of Sciences, Beijing 100083, China.*

E-mail: zhuoran.wang@bit.edu.cn; gzshen@bit.edu.cn

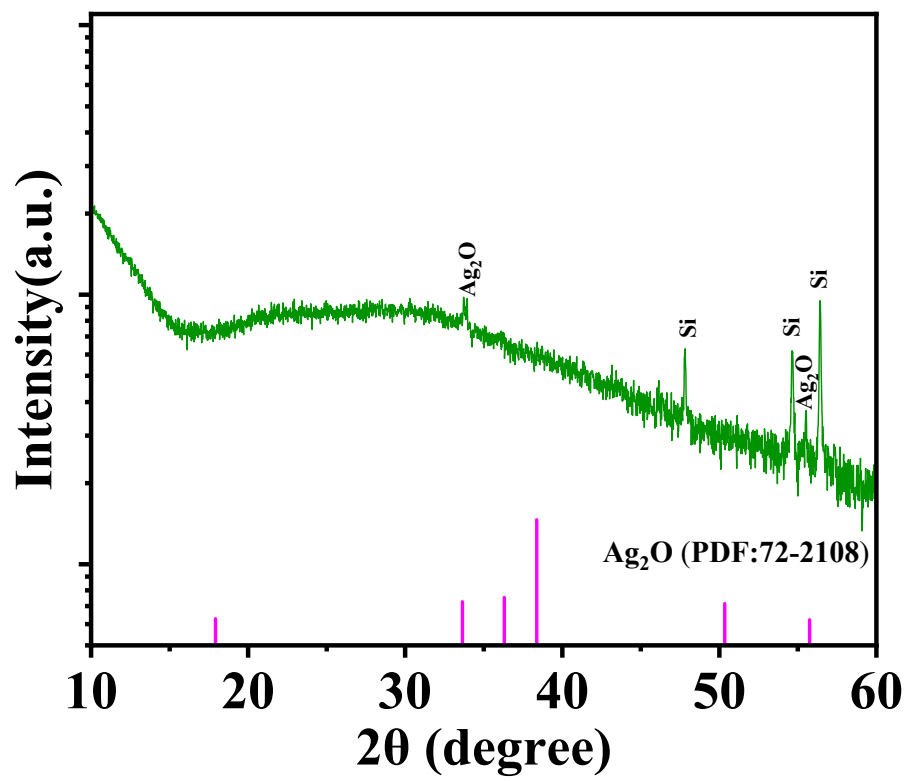

Figure S1 XRD pattern of Ag<sub>2</sub>O on SiO<sub>2</sub>/Si substrate.

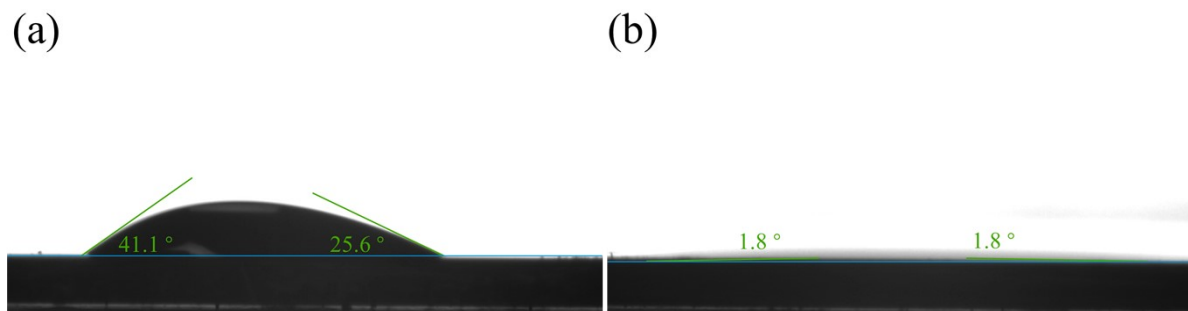

Figure S2 Contact angle test between (a) AgBiS<sub>2</sub> solution and SiO<sub>2</sub> substrate and (b) AgBiS<sub>2</sub> solution and Ag<sub>2</sub>O.

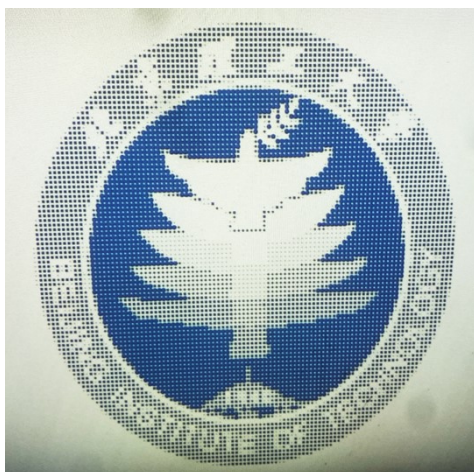

Figure S3 Optical microscope picture of the original mask pattern of the university logo.

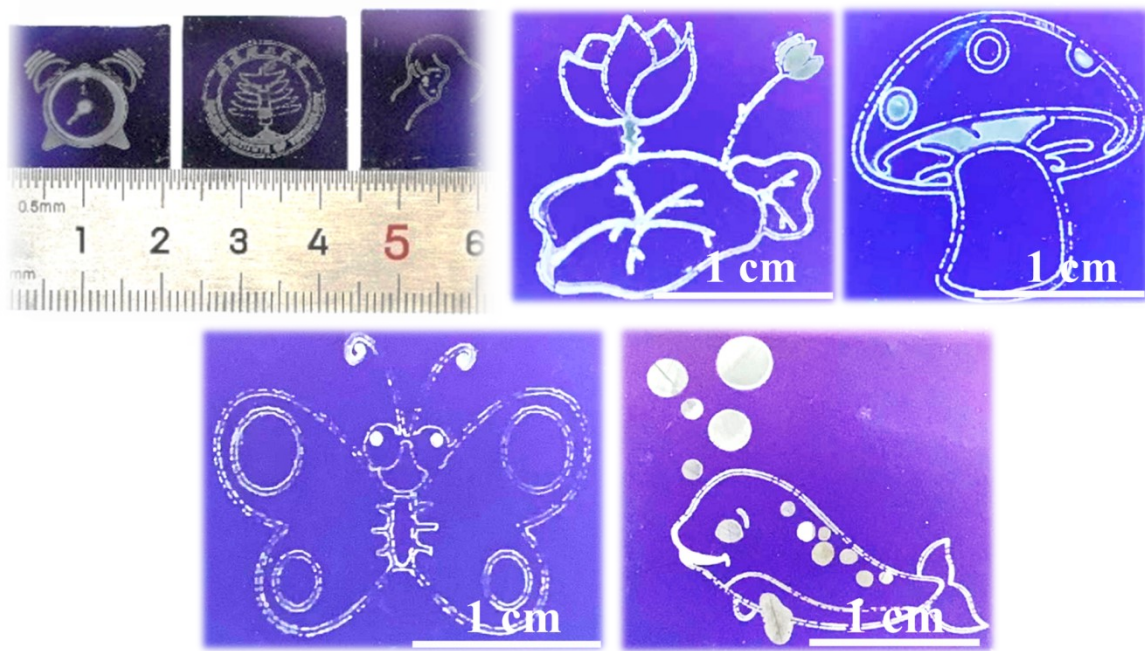

**Figure S4** Photographs of centimeter-scaled patterns of Clock, University Logo, Human Face, Lotus, Mushroom, Butterfly, Peppa Pig and Shark on SiO<sub>2</sub>/Si substrates based on the patterning process.

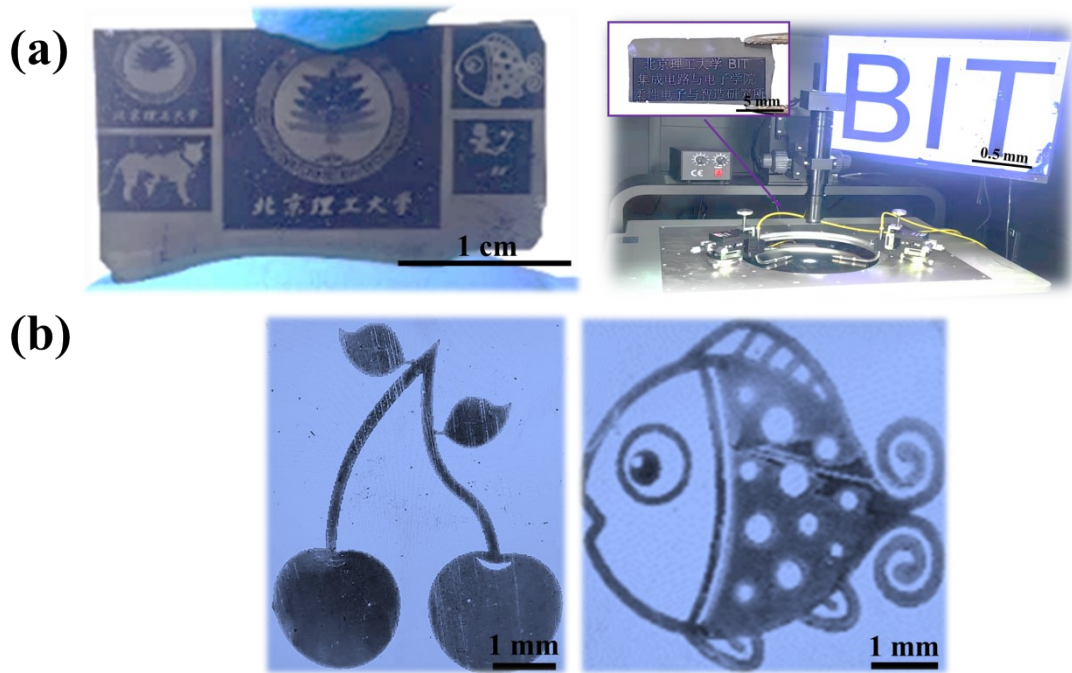

**Figure S5 (a)** Photographs of mini-patterns of university logo, animal schematics (left) and micro-letters of “BIT” stands for Beijing Institute of Technology (right); **(b)** Optical microscope photographs of Panda, Cherries and Goldfish on SiO<sub>2</sub>/Si substrates based on the patterning process.

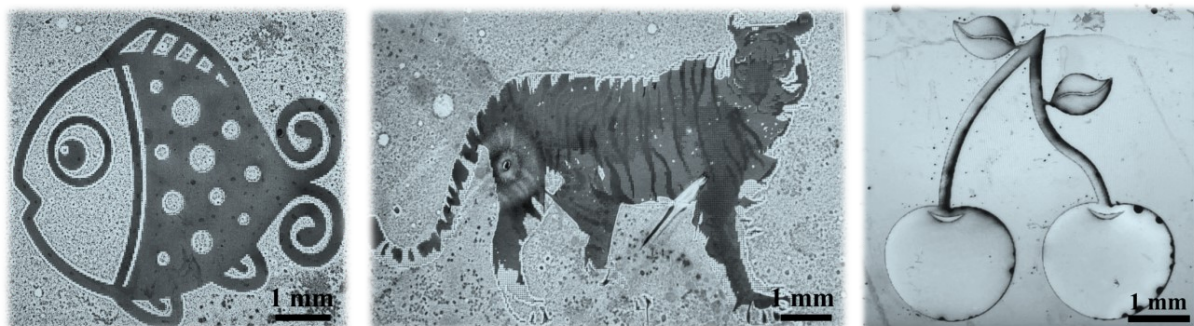

**Figure S6** Optical microscope photographs of Goldfish, Tiger and Cherries on glass substrates based on the patterning process.



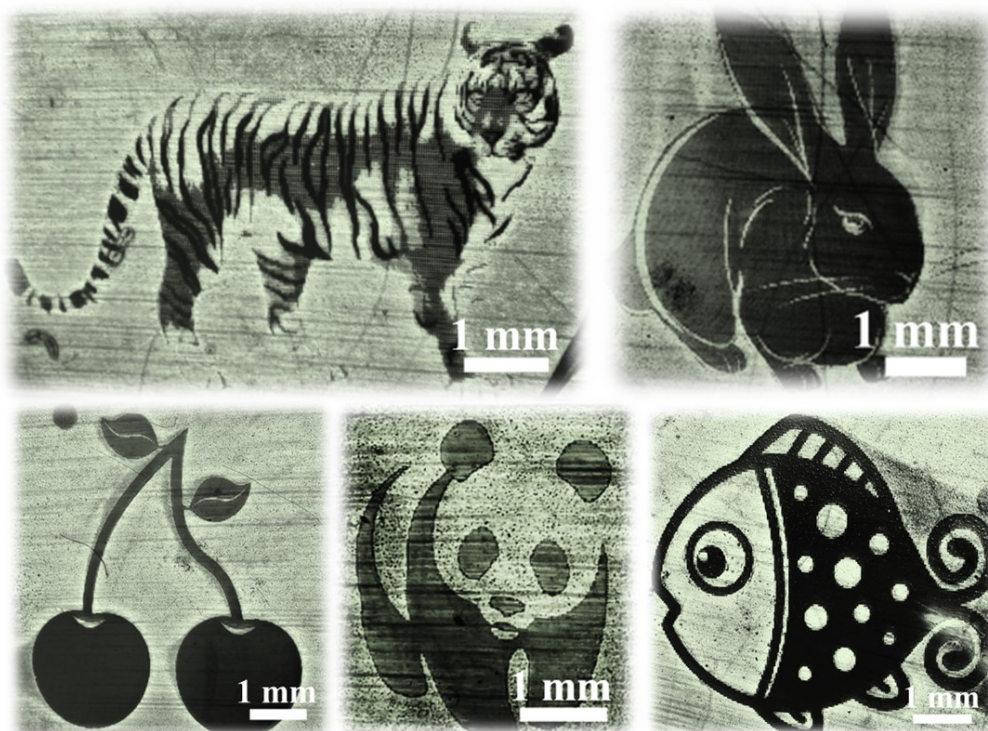

**Figure S7** Optical microscope photographs of Tiger, Rabbit, Cherries, Panda and Goldfish on PET substrates based on the patterning process.



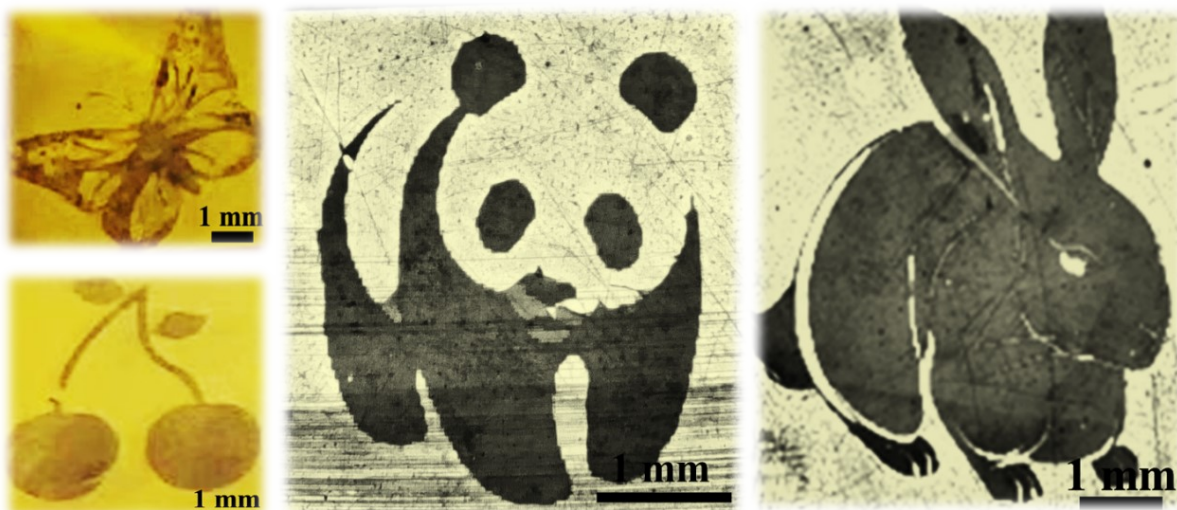

**Figure S8** Photographs of Butterfly and Cherries (left) and optical microscope photographs of Panda and Rabbit (right) on PI substrates based on the patterning process.

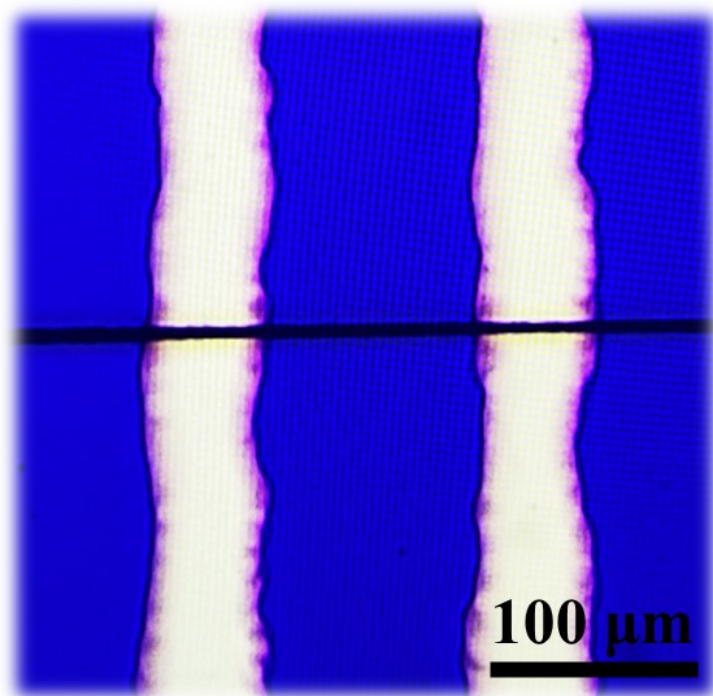

**Figure S9** Optical microscope photographs of one-channel photoconductor.

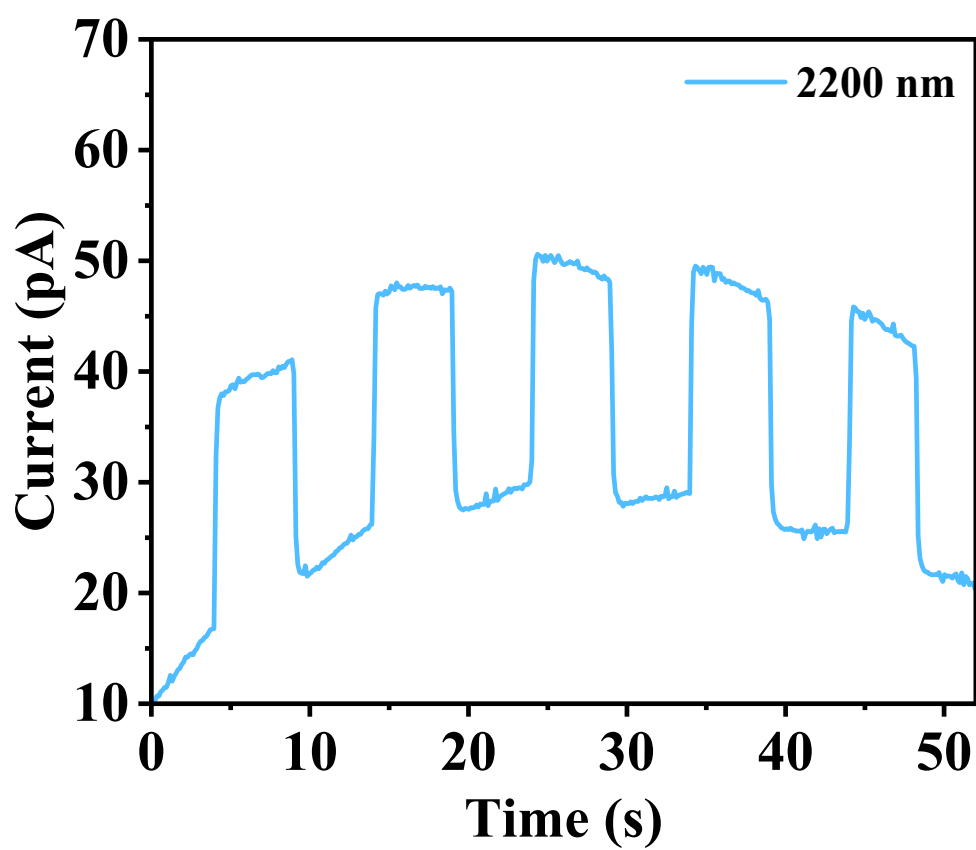

**Figure S10** Photocurrent responses of one-channel photoconductor under 2200 nm illumination (2.5 W/cm<sup>2</sup>).

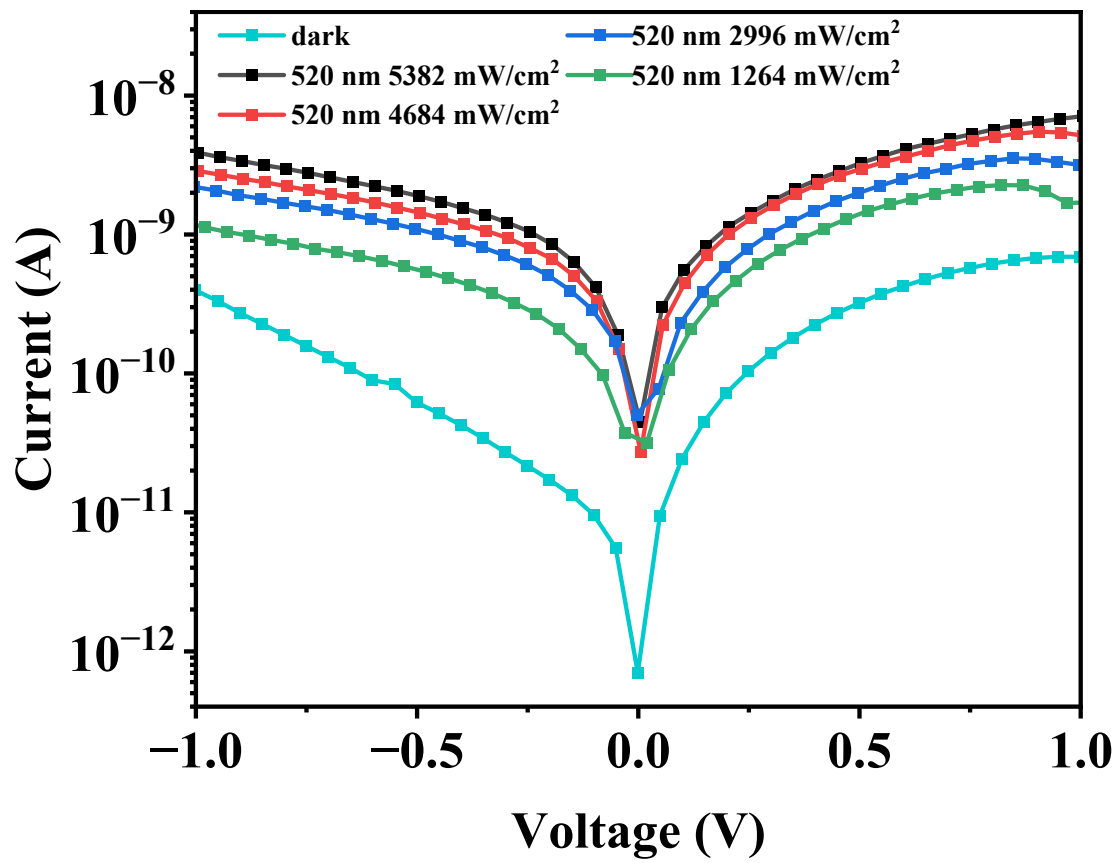

**Figure S11** I-V characteristics of one-channel photoconductor under 520 nm illumination with different light intensities.

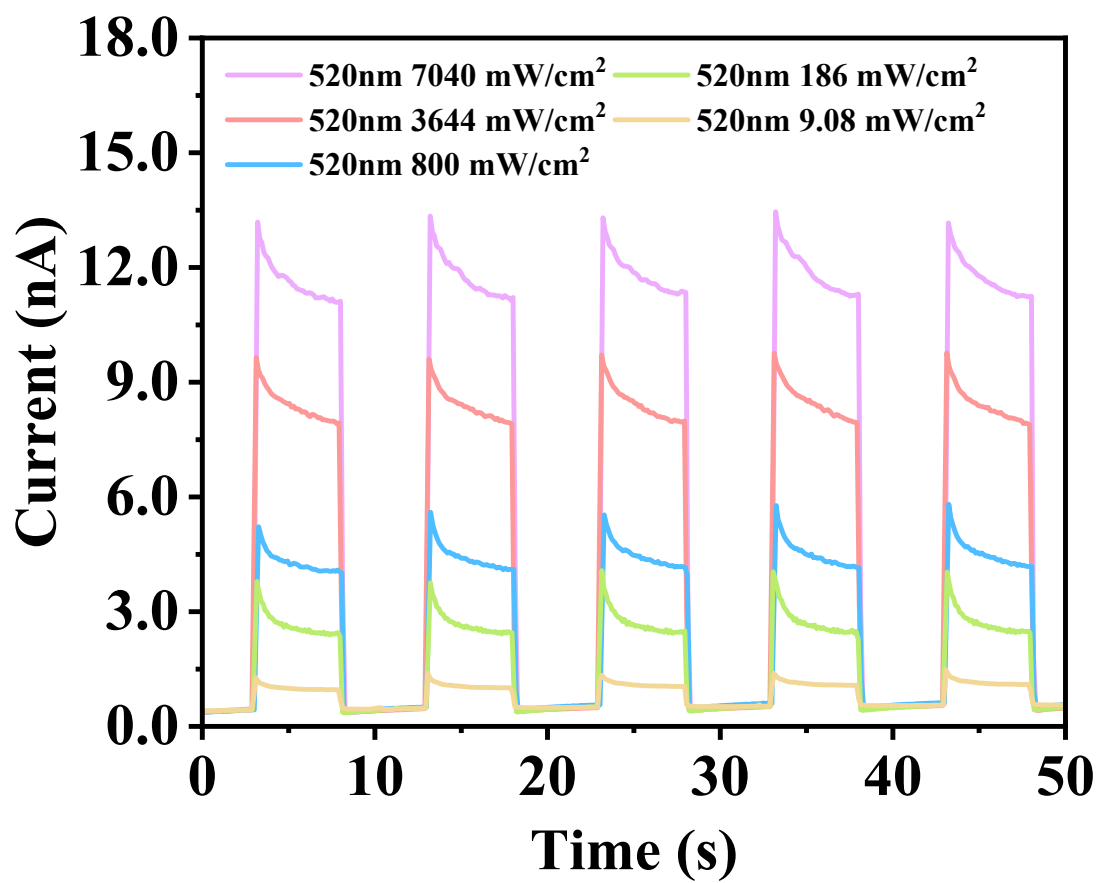

**Figure S 12** Photocurrent responses of one-channel photoconductor under 520 nm illumination with different light intensities.

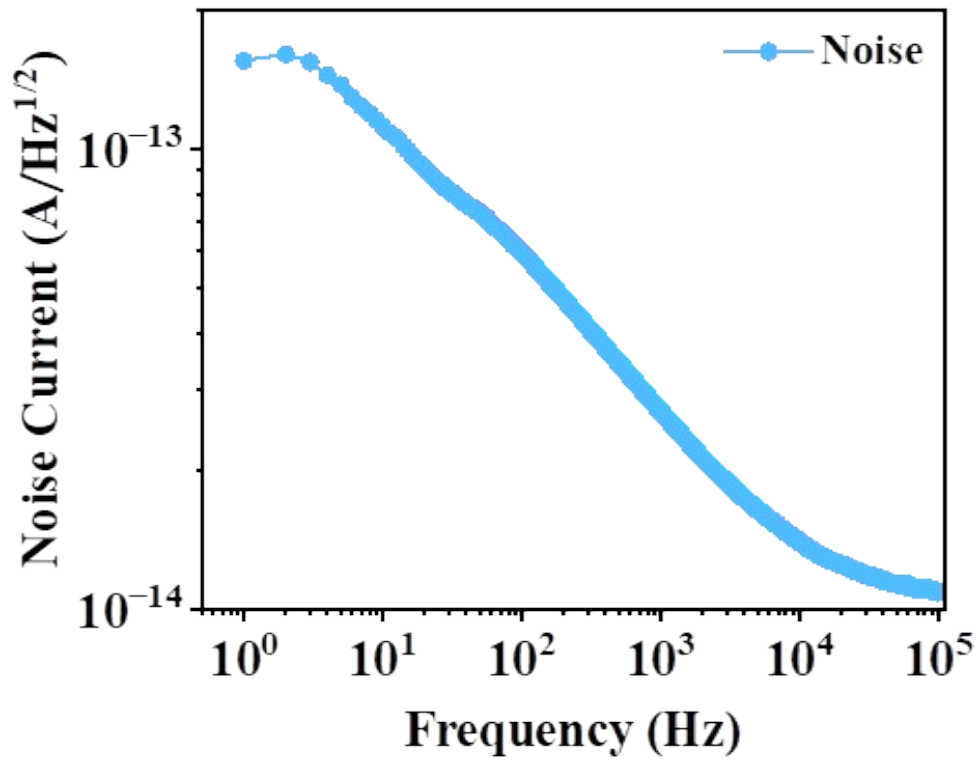

Figure S13 Photodetector noise testing.

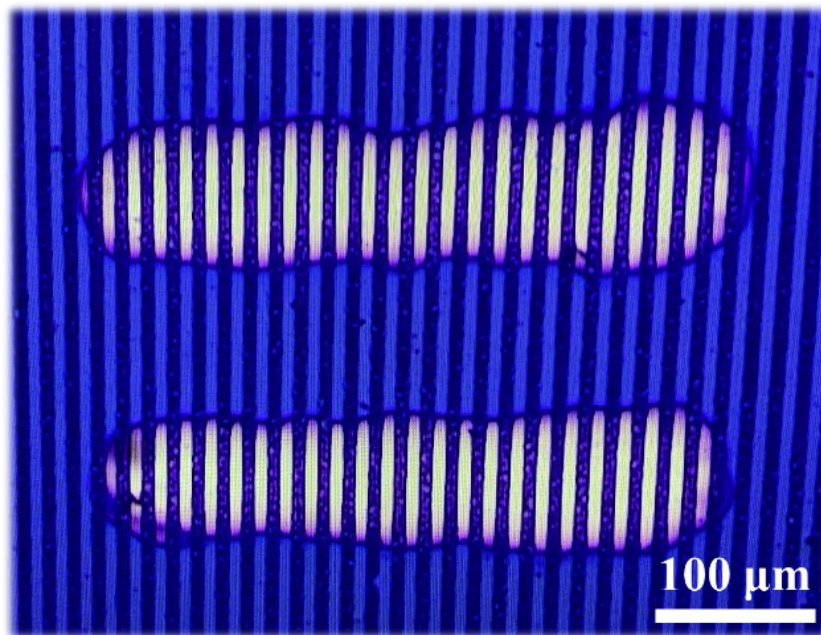

**Figure S 14** Optical microscope photographs of a device of multiple “microroads”.



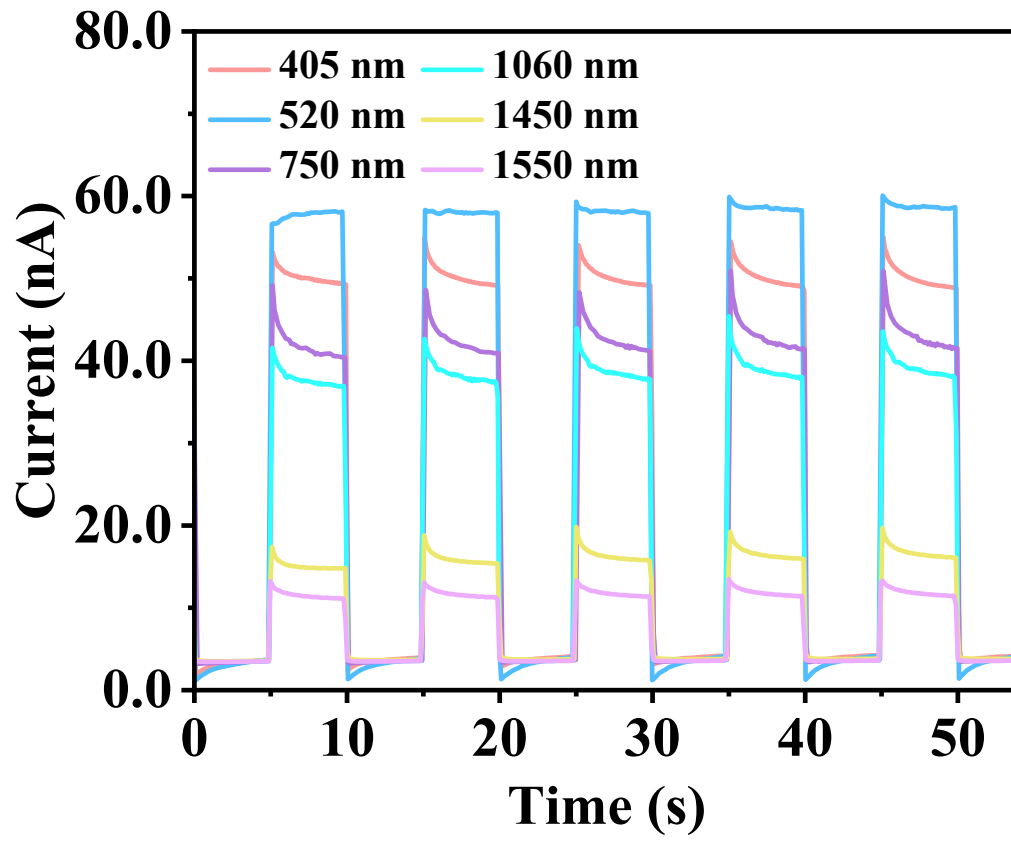

**Figure S 15**  $R_{\lambda}$  and EQE of multiple-channels photodetector with different wavelengths under  $0.5 \text{ W/cm}^2$  light intensity illumination.

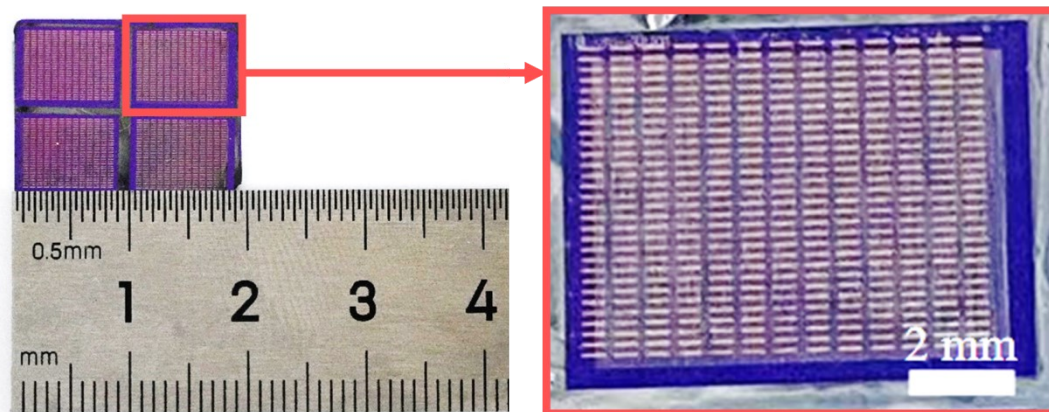

**Figure S16** Photographs of a  $28 \times 12$  pixel photodetector arrays.

## Calculation Formula

Responsivity<sup>1</sup> ( $R_\lambda$ ), external quantum efficiency<sup>1</sup> (EQE) and specific detectivity<sup>2</sup> ( $D^*$ ) can be calculated by the following equations:

$$R_\lambda = \frac{I_{ph} - I_{dark}}{P \cdot A}$$

$$EQE = \frac{Rhc}{q\lambda}$$

$$D^* = \frac{R_\lambda \sqrt{A\Delta f}}{i_n}$$

where  $I_{ph}$  is the photocurrent,  $I_{dark}$  is the dark current, P is the incident light intensity, A is the effective area of the photodetector, h is Planck's constant, c is the speed of light, q is the electron charge,  $i_n$  is the noise current spectral density,  $\Delta f$  is the noise bandwidth, here being 1 Hz and  $\lambda$  is the wavelength of the incident light.

The time required for the  $I_{ph}$  to rise from 10% to 90% and decay from 90% to 10% of its maximum value are defined as rise time ( $\tau_r$ ) and decay time ( $\tau_d$ ), respectively.

The 3dB bandwidth is an essential parameter to characterize the response speed of the system and is calculated as:<sup>3-5</sup>

$$f_{3dB} = \frac{0.443}{\tau_r}$$

## References

- 1 L. Li, P. Wu, X. Fang, T. Zhai, L. Dai, M. Liao, Y. Koide, H. Wang, Y. Bando and D. Golberg, *Adv. Mater.*, 2010, **22**, 3161-3165.
- 2 X. Gong, M. Tong, Y. Xia, W. Cai, J. S. Moon, Y. Cao, G. Yu, C. L. Shieh, B. Nilsson and A. J. Heeger, *Science*, 2009, **325**, 1665-1667.
- 3 L. Dou, Y. M. Yang, J. You, Z. Hong, W. H. Chang, G. Li and Y. Yang, *Nat. Commun.*, 2014, **5**, 5404.
- 4 F. P. García de Arquer, A. Armin, P. Meredith and E. H. Sargent, *Nat. Rev. Mater.*, 2017, **2**.
- 5 C. Bao, Z. Chen, Y. Fang, H. Wei, Y. Deng, X. Xiao, L. Li and J. Huang, *Adv. Mater.*, 2017, **29**.
